# Supplementary material for: Annurca Apple Polyphenols Protect Murine Hair Follicles from Taxane Induced Dystrophy and Hijacks Polyunsaturated Fatty Acid Metabolism toward β-Oxidation
Source: PubMed Central journal article supplement (PMC6267362; doi:10.3390/nu10111808), 2018-11-20
Supplement: nutrients-10-01808-s001.pdf [file nutrients-10-01808-s001.pdf]

# Annurca Apple Polyphenols protect murine Hair Follicles from Taxane Induced Dystrophy and hijacks PUFA metabolism toward $\beta$ -oxidation.

Gennaro Riccio <sup>1†</sup>, Eduardo Sommella <sup>2†</sup>, Nadia Badolati <sup>1</sup>, Emanuela Salvati <sup>2,3</sup>, Sara Bottone <sup>1</sup>, Pietro Campiglia <sup>2</sup>, Monica Dentice <sup>4</sup>, Giancarlo Tenore <sup>1</sup>, Mariano Stornaiuolo <sup>1,\*</sup> and Ettore Novellino <sup>1,\*</sup>

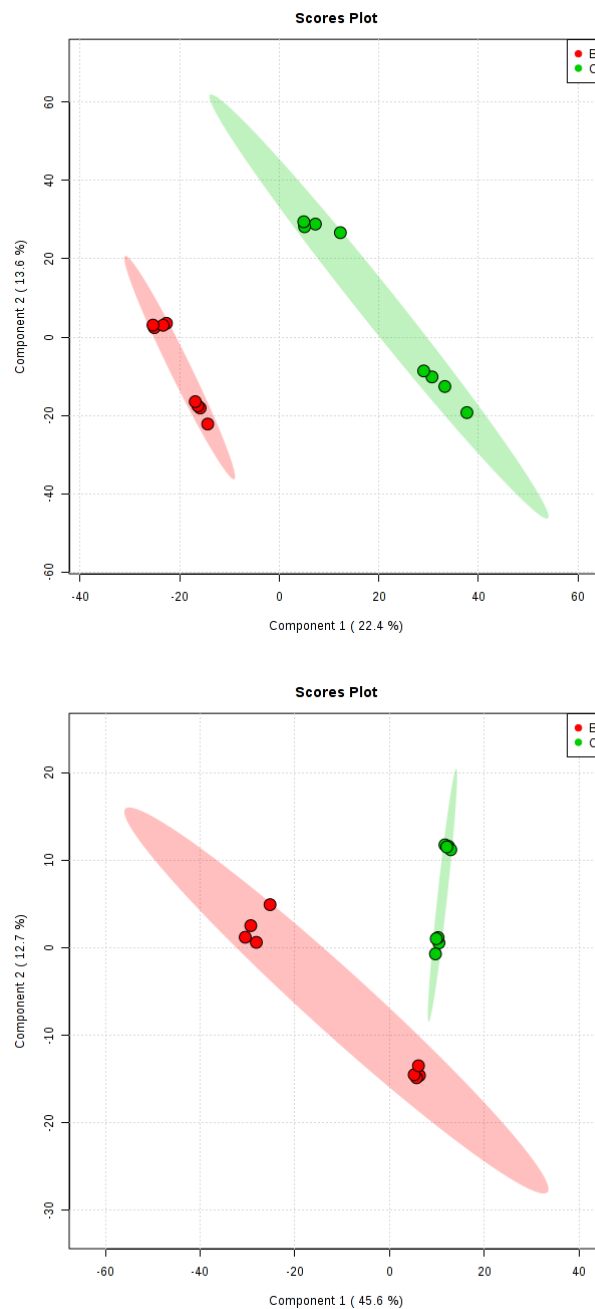

**Figure S1 a (top), b (bottom):** Partial least squares-discriminant analysis (PLS-DA) of HFs metabolites determined by FT-ICR-MS, the two dimensional score plots show clustering and separation between AAE treated mice (green symbols) and Placebo (red symbols). Ellipses represent 95% confidence intervals.

| IUPAC NAME                                                                                          | Metabolite                     | m/z      | $\Delta m/z$ [ppm] | Ions                |
|-----------------------------------------------------------------------------------------------------|--------------------------------|----------|--------------------|---------------------|
| (5Z,8Z,11Z,14Z)-icosa-5,8,11,14-tetraenoic acid                                                     | ARA 20:4 $\omega$ -6           | 327.2295 | 0.236              | [M+Na] <sup>+</sup> |
| (4Z,6E,8S,10Z)-8-hydroxyhexadeca-4,6,10-trienoic acid                                               | Tetranor 12-HETE               | 289.1774 | 0.023              | [M+Na] <sup>+</sup> |
| (5Z,8Z,11Z)-14,15-dihydroxyicosa-5,8,11-trienoic acid                                               | 14,15-DiHETrE                  | 361.235  | 0.018              | [M+Na] <sup>+</sup> |
| 5-[(1R,2R,3R,5S)-3,5-dihydroxy-2-[(1E,3S)-3-hydroxyoct-1-en-1-yl]cyclopentyl]-4-oxopentanoic acid   | 2,3-Dinor-6-keto-PGF1 $\alpha$ | 365.1936 | 0.323              | [M+Na] <sup>+</sup> |
| (5Z)-7-[(1R,5S)-2-oxo-5-(3-oxooctyl)cyclopent-3-en-1-yl]hept-5-enoic acid                           | 15-Keto-13,14-dihydroPGA2      | 357.2037 | -0.124             | [M+Na] <sup>+</sup> |
| (5E)-7-[(1R,2R,3R,5S)-3,5-dihydroxy-2-[(1E,3S)-3-hydroxyoct-1-en-1-yl]cyclopentyl]hept-5-enoic acid | Prostaglandin F2 $\alpha$      | 377.2300 | 0.171              | [M+Na] <sup>+</sup> |
| (5E)-7-[3,5-dihydroxy-2-(3-hydroxyoctyl)cyclopentyl]hept-5-enoic acid                               | 13,14-dihydro-PGF2 $\alpha$    | 357.2612 | 0.038              | [M+Na] <sup>+</sup> |
| (Z)-7-[(1S,5E)-5-[(E)-oct-2-enylidene]-4-oxocyclopent-2-en-1-yl]hept-5-enoic acid                   | 15-deoxy- $\Delta$ 12,14-PGJ2  | 339.1932 | 0.022              | [M+Na] <sup>+</sup> |
| (5Z,8Z,11Z,14Z,17Z)-icosa-5,8,11,14,17-pentaenoic acid                                              | EPA 20:5 $\omega$ -3           | 325.2050 | 0                  | [M+Na] <sup>+</sup> |
| (6E,8Z,11Z,14Z,17Z)-5-hydroxyicosa-6,8,11,14,17-pentaenoic acid                                     | 5-HEPE                         | 341.2088 | 0.289              | [M+Na] <sup>+</sup> |
| (4Z,7Z,10Z,13Z,16Z,19Z)-docosa-4,7,10,13,16,19-hexaenoic acid                                       | DHA 22:6 $\omega$ -3           | 351.2295 | 0.113              | [M+Na] <sup>+</sup> |
| (4Z,7Z,10Z,13Z,15E,19Z)-17-hydroxydocosa-4,7,10,13,15,19-hexaenoic acid                             | 17-HDoHE                       | 367.2245 | 0.416              | [M+Na] <sup>+</sup> |
| (3Z,6E,8E,12Z,15Z,18Z)-docosa-3,6,8,12,15,18-hexaen-10-ol                                           | 13-HDoHE                       | 337.2503 | -0.099             | [M+Na] <sup>+</sup> |
| (4Z,7Z,10Z,13Z,16Z)-19,20-dihydroxydocosa-4,7,10,13,16-pentaenoic acid                              | 19,20-DiHDPA                   | 385.235  | 0.393              | [M+Na] <sup>+</sup> |
| (9Z,12Z,15Z)-octadeca-9,12,15-trienoic acid                                                         | $\alpha$ -LA 18:3 $\omega$ -3  | 301.2138 | 0.023              | [M+Na] <sup>+</sup> |
| (9Z,12Z)-octadeca-9,12-dienoic acid                                                                 | LA 18:2 $\omega$ -6            | 303.2295 | -0.017             | [M+Na] <sup>+</sup> |
| (12Z)-9,10-dihydroxyoctadec-12-enoic acid                                                           | 9,10-DHOME                     | 313.2384 | -0.098             | [M-H] <sup>-</sup>  |
| (9Z,11E,13S)-13-hydroperoxyoctadeca-9,11-dienoic acid                                               | 13-HpODE                       | 335.2193 | -0.017             | [M+Na] <sup>+</sup> |
| (9S,10E,12S,13S)-9,12,13-trihydroxyoctadec-10-enoic acid                                            | 9,12,13-TriHOME                | 353.2299 | -0.094             | [M+Na] <sup>+</sup> |

**Table S1:** Identification of metabolites in HFs determined by DI- FT-ICR-MS
